# Supplementary material for: Sustained IFN-I stimulation impairs MAIT cell responses to bacteria by inducing IL-10 during chronic HIV-1 infection
Source: PubMed Central journal article supplement — Sci Adv. 2020 Feb 19;6(8):eaaz0374. doi: 10.1126/sciadv.aaz0374 (PMC7030930; doi:10.1126/sciadv.aaz0374), 2020-02-19
Supplement: aaz0374_SM.pdf [file aaz0374_SM.pdf]

## Supplementary Materials for

### **Sustained IFN-I stimulation impairs MAIT cell responses to bacteria by inducing IL-10 during chronic HIV-1 infection**

X. Tang, S. Zhang, Q. Peng, L. Ling, H. Shi, Y. Liu, L. Cheng, L. Xu, L. Cheng, L. A. Chakrabarti, Z. Chen, H. Wang, Z. Zhang\*

\*Corresponding author. Email: zhangz2019@mail.sustech.edu.cn

Published 19 February 2020, *Sci. Adv.* **6**, eaaz0374 (2020)  
DOI: 10.1126/sciadv.aaz0374

#### **The PDF file includes:**

Fig. S1. Frequency and function of MAIT cells in HIV-1–infected patients during ART treatment.

Fig. S2. T cell analysis using Abseq and scRNAseq.

Fig. S3. MAIT cell dysfunction during HIV-1 infection is not ascribed to inhibitory receptors.

Fig. S4. IFN- $\alpha$  does not induce MAIT cell death or apoptosis.

Fig. S5. IFN- $\alpha$ –induced IL-10 inhibits IL-12, thus dampening MAIT cell function.

Table S1. Clinical characteristics of the enrolled participants.

Table S2. BD Rhapsody Abseq antibody panel.

Table S3. BD Rhapsody T cell expression panel.

Table S4. List of significantly up-regulated or down-regulated genes in MAIT cells from VIR versus HC subjects.

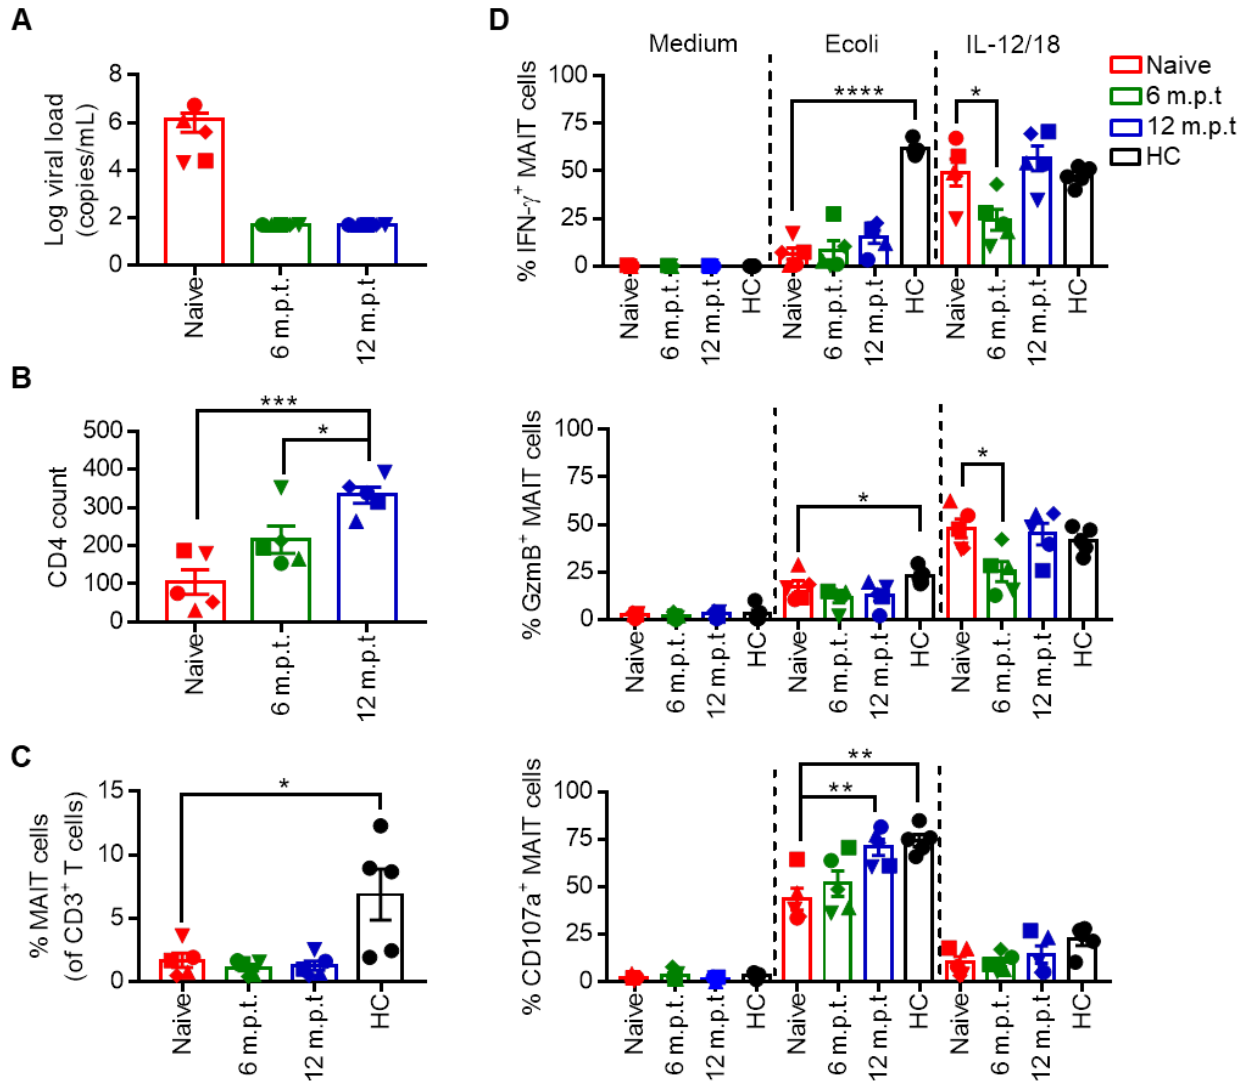

**Fig. S1. Frequency and function of MAIT cells in HIV-1-infected patients during ART treatment.** HIV-1 viral loads (A) and CD4<sup>+</sup> T cell counts (B) in HIV-1-infected patients (n=5) at three time points of treatment: pre-ART, 6 and 12 months post-ART (m.p.t.). (C) The frequency of MAIT cells in frozen PBMCs from those patients and HCs (n=5). (D) The expression level of IFN- $\gamma$ , GzmB, and CD107a in MAIT cells in PBMCs upon stimulation with *E. coli* or IL-12/18.

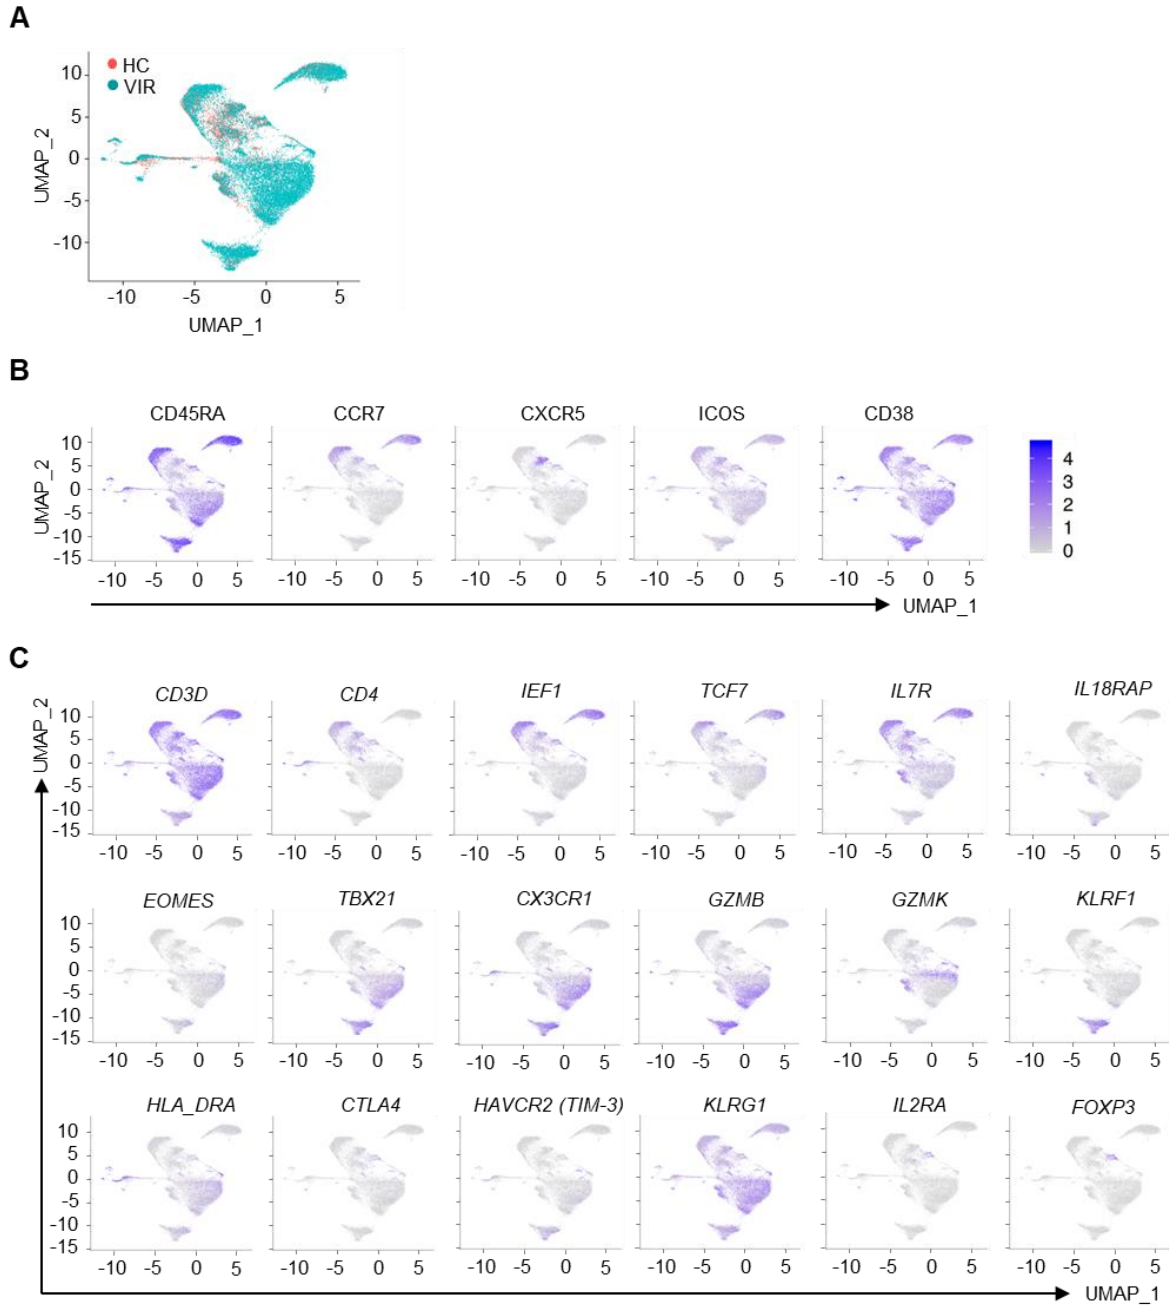

**Fig. S2. T cell analysis using Abseq and scRNAseq.** (A) UMAP plots of cells shown in Figure 2, with color-coding of cells from HC or VIR subjects. (B) UMAP plots highlighting the expression of selected surface proteins. (C) UMAP plots highlighting the expression of selected genes.

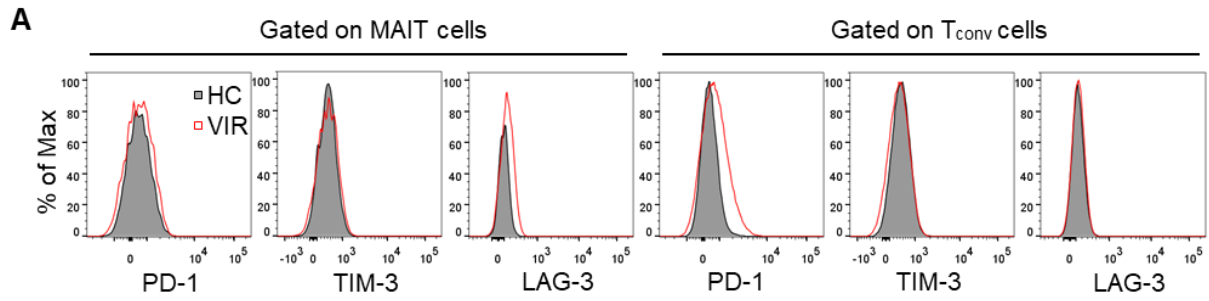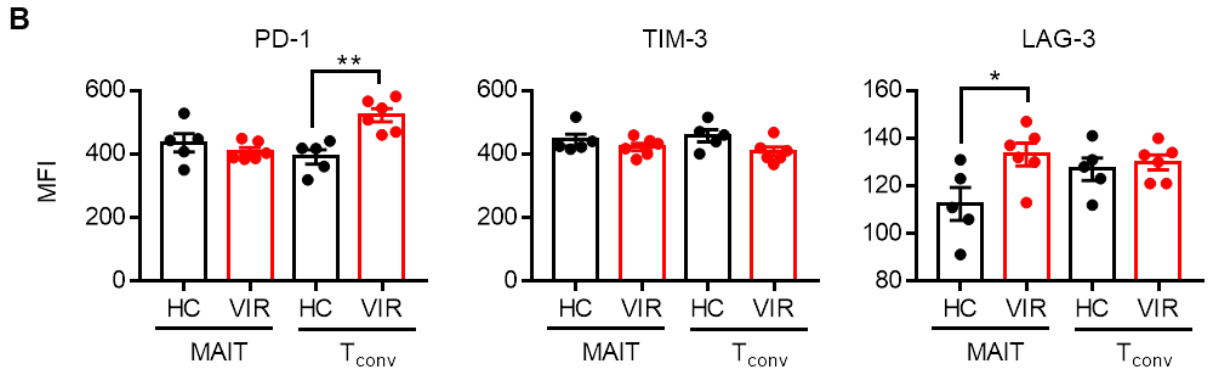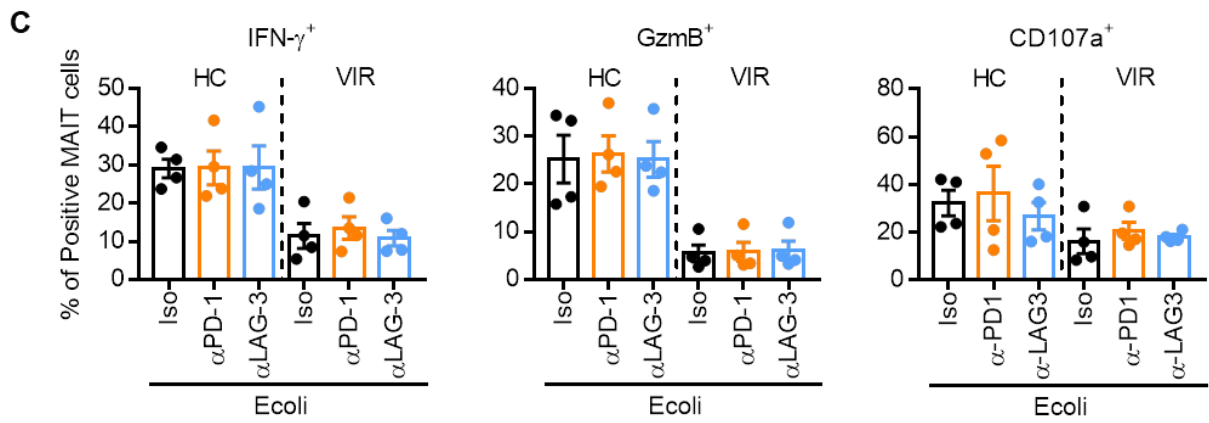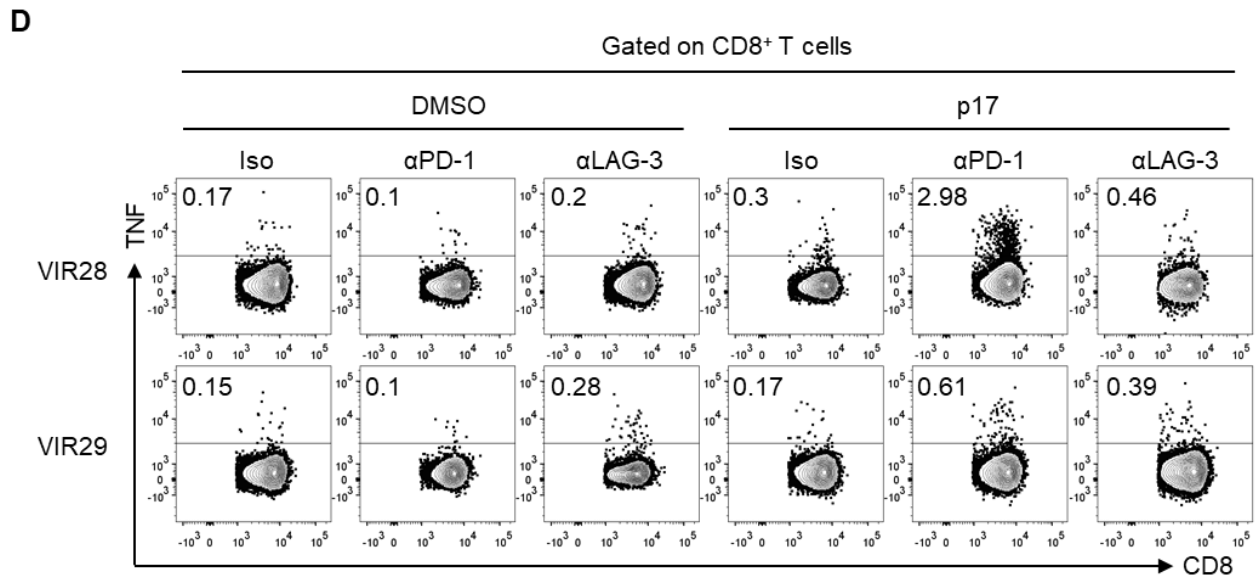

**Fig. S3. MAIT cell dysfunction during HIV-1 infection is not ascribed to inhibitory receptors.** (A-B) PD1, TIM3 and LAG3 expression on the cell surface of MAIT cells from HC or VIR subjects as determined by flow cytometry. Representative histograms (A) and statistical analysis (B) are shown. (C) MAIT cells in PBMC freshly isolated from HC (n = 4) or ART-free HIV<sup>+</sup> (n = 4) subjects were stimulated with PFA-fixed *E. coli* for 24 h in the presence of anti-PD-1 ( $\alpha$ PD-1) or anti-LAG-3 ( $\alpha$ LAG-3) blocking antibodies and then assessed for the expression levels of IFN $\gamma$ , GzmB, and CD107a in MAIT cells. (D) PBMCs from VIR subjects (n = 2) were stimulated with an HIV-1 p17 peptide pool or DMSO as a control and then assessed for the production of TNF in CD8<sup>+</sup> T cells.

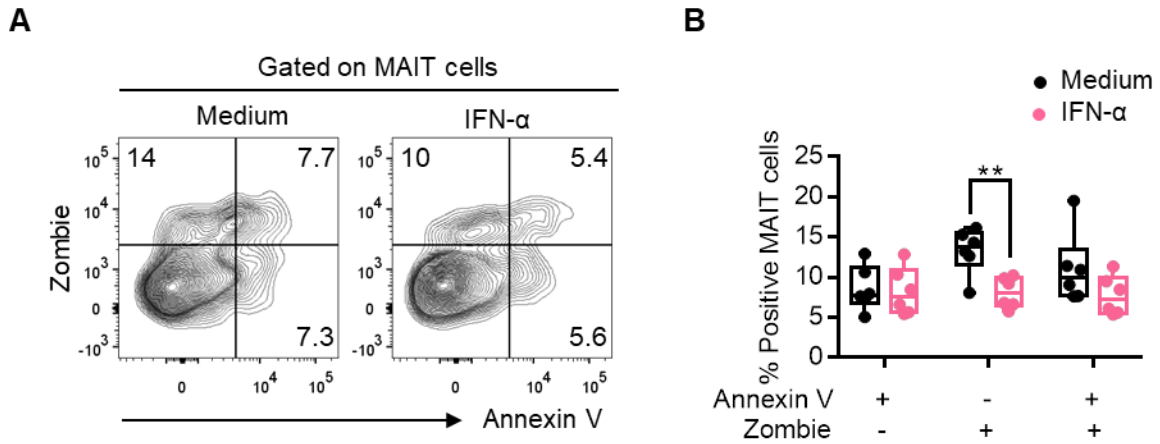

**Fig. S4. IFN- $\alpha$  does not induce MAIT cell death or apoptosis.** Freshly isolated PBMCs from healthy blood donors ( $n = 6$ ) were left untreated or treated with IFN- $\alpha$  at a concentration of 100 ng/mL for 72 h and assessed for cell death and apoptosis using Zombie Green and Annexin V-APC. Representative FACS plots (**A**) and statistical analysis (**B**) are shown.

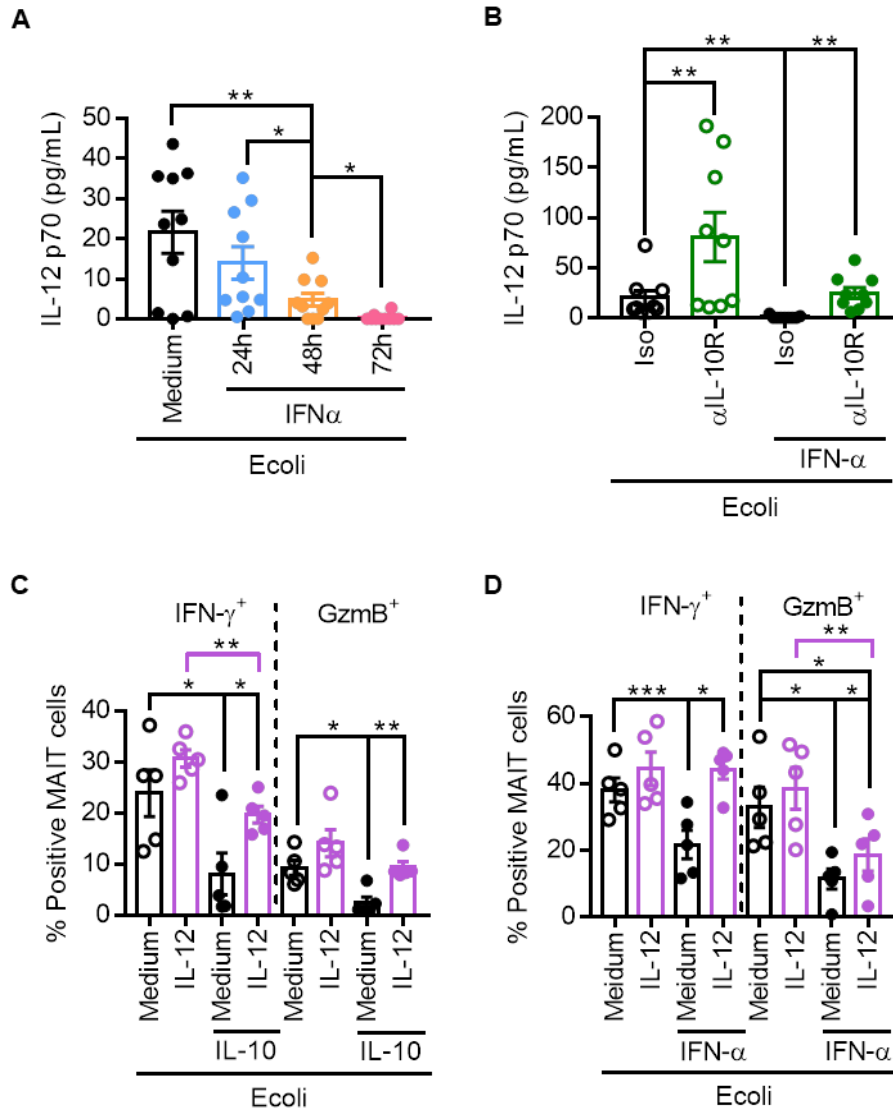

**Fig. S5. IFN- $\alpha$ -induced IL-10 inhibits IL-12, thus dampening MAIT cell function.** (A) Levels of IL-12 p70 in the supernatant of PBMCs treated with IFN- $\alpha$  for 24-72 h followed by *E. coli* stimulation. (B) Levels of IL-12 p70 in the supernatant of PBMCs treated with IFN- $\alpha$  for 72 h in the presence of an anti-IL-10R ( $\alpha$ IL-10R, 10  $\mu$ g/mL) or isotype control antibody followed by *E. coli* stimulation. (C-D) Levels of IFN $\gamma$  and GzmB expression in MAIT cells in PBMCs pre-treated with IL-10 (C) or IFN- $\alpha$  (D) at 100 ng/mL for 72 h followed by *E. coli* stimulation in the presence or absence of IL-12 (100 ng/mL).

**Table S1. Clinical characteristics of the enrolled participants.**

| Group                          | HC            | VIR               | ART           | <i>P-value</i> |           |            |
|--------------------------------|---------------|-------------------|---------------|----------------|-----------|------------|
|                                |               |                   |               | HC vs VIR      | HC vs ART | VIR vs ART |
| n                              | 32            | 49                | 35            |                |           |            |
| Age, yrs                       | 31.59 ± 1.694 | 34.69 ± 1.652     | 35.03 ± 1.624 | 0.2199         | 0.0787    | 0.6629     |
| Sex<br>(female/male)           | 6/21          | 4/45              | 4/31          | 0.182          | 0.501     | 0.7137     |
| CD4 counts<br>(cells/ $\mu$ L) | ND            | 212.2 ± 21.81     | 512.5 ± 28.45 | NA             | NA        | <0.0001    |
| Viral loads (log<br>copies/mL) | NA            | 4.702 ±<br>0.2049 | <1.7          | NA             | NA        | <0.0001    |
| Duration of<br>ART (months)    | NA            | NA                | 46.54 ± 3.554 | NA             | NA        | NA         |

ND: not done.

NA: not applicable.



**Table S2. BD Rhapsody Abseq antibody panel.**

| Target | Clone      | Barcode Sequence                      |
|--------|------------|---------------------------------------|
| CD3    | SK7        | AAAGGTAGAGTGTATTGACGTCGGTGTAGGTTGATT  |
| CD4    | SK3        | TCGGTGTTATGAGTAGGTCGTCGTGCGGTTTGATGT  |
| CD11a  | HI111      | AAGTAGAGTAGTCGATTGTTTGATGCGCCAGATGTC  |
| CD11b  | M1/70      | ATCGTTATTCGTTGTAGTTCGCCCCGGTTTGAGTAGT |
| CD45RA | HI100      | AAGCGATTGCGAAGGGTTAGTCAGTACGTTATGTTG  |
| PD1    | EH12.1     | ATGGTAGTATCACGACGTAGTAGGGTAATTGGCAGT  |
| CD69   | FN50       | CAATAACGGGTCATAGTAAGTCGCGAGTAAGAGGGC  |
| CD38   | HIT2       | GTCAACGATGGGTAGCGGTAGAAATAACGGAACTGG  |
| CD62L  | DREG-56    | ATGGTAAATATGGGCGAATGCGGGTTGTGCTAAAGT  |
| CXCR4  | 12G5       | CAGTGTTTAGAGCGGGTTGCATATGTCGTTTAGAGG  |
| CD127  | HIL-7R-M21 | AGTTATTAGGCTCGTAGGTATGTTTAGGTTATCGCG  |
| CD134  | ACT35      | GGTGTGGTAAGACGGACGGAGTAGATATTCGAGGT   |
| CD27   | M-T271     | TGTCCGGTTTAGCGAATTGGGTTGAGTCACGTAGGT  |
| CD7    | M-T701     | GTATGTAGGTCTTATGTGTTGGCGTAGTATGCGTTT  |
| CXCR3  | 1C6/CXCR3  | AAAGTGTTGGCGTTATGTGTTTCGTTAGCGGTGTGGG |
| CD152  | BNI3       | TAGTATCCGTAGTAGTTATCTGCCCGTTCGTTATGC  |
| CD5    | UCHT2      | ACGAAGCGAGCGAAGAACCCTATGCGATTGAGTAAGT |
| CD44   | G44-26     | CATGATTGTCGGGTGGGTATAGCGTTTCGTGATTTCG |
| CXCR5  | RF8B2      | AGGAAGGTCGATTGTATAACGCGGCATTGTAACGGC  |
| ICOS   | DX29       | ATAGTCCGCCGTAATCGTTGTGTCGCTGAAAGGGTT  |
| CD2    | RPA-2.10   | AAACGTAGATTAGAGCCGGGTATGTCGCAACTGATT  |
| CD154  | TRAP1      | TAAGAGGTAAGTGCATTCGGGTATAGGCGTGATTTG  |
| CD137  | 4B4-1      | TGACAAGCAACGAGCGATACGAAAGGCGAAATTAGT  |
| CD335  | 9E2/NKp46  | CAATTTGTTTCGCGTTTAGTAGTCGTCGTCTTATGGG |
| CD54   | HA58       | AAGAGAATATATGCGTGCGTTGTTAAGGGAATGCGT  |
| CD9    | M-L13      | GGGTTGTAAGTCGTCGGAAGTGTGAAGCGTATAGTG  |
| CD94   | HP-3D9     | GAGGTTAGGATAGGTGTACGGGTCGAGTTGAATTCT  |
| CD126  | M5         | AATGGTGAATCGCCCTAGCAAGTGGTATCGGAATCG  |
| CD98   | UM7F8      | GTTGGCGTTAGGTGTTCGATTGTATGGGTTATGCTGC |

**Table S3. BD Rhapsody T cell expression panel.**

| Gene name | Accession number | Gene name | Accession number  |
|-----------|------------------|-----------|-------------------|
| AIM2      | NM 004833.1      | IL12RB1   | NM 005535.2       |
| ANXA5     | NM 001154.3      | IL12RB2   | NM 001559.2       |
| APOBEC3G  | NM 021822.3      | IL13      | NM 002188.2       |
| ARL4C     | NM 005737.3      | IL15      | ENST00000477265.5 |
| AURKB     | NM 004217.3      | IL15RA    | NM 002189.3       |
| B3GAT1    | NM 018644.3      | IL17A     | NM 002190.2       |
| BAX       | NM 001291428.1   | IL17F     | NM 052872.3       |
| BCL11B    | NM 022898.2      | IL18      | NM 001562.3       |
| BCL2      | NM 000633.2      | IL18R1    | NM 003855.3       |
| BCL6      | NM 001706.4      | IL18RAP   | NM 003853.3       |
| BIN2      | NM 016293.3      | ILIR2     | NM 004633.3       |
| BTG1      | NM 001731.2      | IL2       | NM 000586.3       |
| BTLA      | NM 181780.3      | IL21      | NM 021803.3       |
| C10orf54  | NM 022153.1      | IL22      | NM 020525.4       |
| CASP3     | NM 004346.3      | IL23R     | NM 144701.2       |
| CBLB      | NM 170662.4      | IL25      | NM 022789.3       |
| CCL1      | NM 002981.2      | IL2RA     | NM 000417.2       |
| CCL2      | NM 002982.3      | IL2RB     | NM 000878.3       |
| CCL20     | NM 004591.2      | IL3       | NM 000588.3       |
| CCL3      | NM 002983.2      | IL31      | NM 001014336.1    |
| CCL4      | NM 002984.3      | IL32      | NM 004221.4       |
| CCL5      | NM 002985.2      | IL4       | NM 000589.3       |
| CCNB1     | NM 031966.3      | IL4R      | NM 000418.3       |
| CCND2     | NM 001759.3      | IL5       | NM 000879.2       |
| CCR1      | NM 001295.2      | IL6       | NM 000600.4       |
| CCR10     | NM 016602.2      | IL6R      | NM 000565.3       |
| CCR2      | NM 001123041.2   | IL7R      | NM 002185.3       |
| CCR3      | NM 001837.3      | IL9       | NM 000590.1       |
| CCR4      | NM 005508.4      | IL9R      | NM 002186.2       |
| CCR5      | NM 000579.3      | IRF4      | NM 002460.3       |
| CCR6      | NM 004367.5      | IRF8      | NM 002163.2       |
| CCR7      | NM 001838.3      | ITGA4     | NM 000885.5       |
| CCR8      | NM 005201.3      | ITGAE     | NM 002208.4       |
| CCR9      | NM 006641.3      | ITGAL     | NM 002209.2       |
| CD160     | NM 007053.3      | ITGAM     | NM 000632.3       |
| CD2       | NM 001767.3      | ITGAX     | NM 000887.4       |
| CD244     | NM 016382.3      | ITGB2     | NM 000211.4       |
| CD247     | NM 000734.3      | ITK       | NM 005546.3       |

|        |             |        |                |
|--------|-------------|--------|----------------|
| CD27   | NM 001242.4 | JUN    | NM 002228.3    |
| CD274  | NM 014143.3 | JUNB   | NM 002229.2    |
| CD300A | NM 007261.3 | KIT    | NM 000222.2    |
| CD3D   | NM 000732.4 | KLRB1  | NM 002258.2    |
| CD3E   | NM 000733.3 | KLRCI  | NM 002259.4    |
| CD3G   | NM 000073.2 | KLRC3  | NM 002261.2    |
| CD4    | NM 000616.4 | KLRC4  | NM 013431.2    |
| CD40LG | NM 000074.2 | KLRF1  | NM 016523.2    |
| CD44   | NM 000610.3 | KLRG1  | NM 005810.3    |
| CD48   | NM 001778.3 | KLRKI  | NM 007360.3    |
| CD5    | NM 014207.3 | LAG3   | NM 002286.5    |
| CD52   | NM 001803.2 | LAIR2  | NM 002288.5    |
| CD6    | NM 006725.4 | LAP3   | NM 015907.2    |
| CD69   | NM 001781.2 | LAT    | NM 014387.3    |
| CD7    | NM 006137.6 | LAT2   | NM 014146.3    |
| CD70   | NM 001252.4 | LCK    | NM 005356.4    |
| CD8A   | NM 001768.6 | LEF1   | NM 016269.4    |
| CD8B   | NM 004931.4 | LGALS1 | NM 002305.3    |
| CD9    | NM 001769.3 | LGALS3 | NM 002306.3    |
| CHI3L2 | NM 004000.2 | LIF    | NM 002309.4    |
| CLC    | NM 001828.5 | LILRB4 | NM 001278426.3 |
| CLEC2D | NM 013269.5 | LRRC32 | NM 005512.2    |
| CNOT2  | NM 014515.5 | LTA    | NM 000595.3    |
| CSF2   | NM 000758.3 | LTB    | NM 002341.1    |
| CSF3   | NM 000759.3 | MKI67  | NM 002417.4    |
| CST7   | NM 003650.3 | MYC    | NM 002467.4    |
| CTLA4  | NM 005214.4 | NAMPT  | NM 005746.2    |
| CTSW   | NM 001335.3 | NCR3   | NM 147130.2    |
| CX3CR1 | NM 001337.3 | NINJ2  | NM 016533.5    |
| CXCL10 | NM 001565.3 | NKG7   | NM 005601.3    |
| CXCL13 | NM 006419.2 | NT5E   | NM 002526.3    |
| CXCL8  | NM 000584.3 | OAS1   | NM 016816.3    |
| CXCL9  | NM 002416.2 | PASK   | NM 015148.3    |
| CXCR1  | NM 000634.2 | PDCDI  | NM 005018.2    |
| CXCR3  | NM 001504.1 | PECAM1 | NM 000442.4    |
| CXCR4  | NM 003467.2 | PIK3PI | NM 052880.4    |
| CXCR5  | NM 001716.4 | PMCH   | NM 002674.3    |
| CXCR6  | NM 006564.1 | PRDMI  | NM 001198.3    |
| DPP4   | NM 001935.3 | PRF1   | NM 005041.4    |
| DUSP1  | NM 004417.3 | PTGDR2 | NM 004778.2    |
| DUSP2  | NM 004418.3 | PTTG2  | NM 006607.2    |

|          |                   |             |                    |
|----------|-------------------|-------------|--------------------|
| DUSP4    | NM 001394.6       | PYCR1       | NM 006907.3        |
| EGR1     | NM 001964.2       | RORA        | NM 002943.3        |
| EGR3     | NM 004430.2       | RORC        | NM 005060.3        |
| ENTPD1   | NM 001776.5       | RUNX3       | NM 004350.2        |
| EOMES    | NM 005442.3       | SIPR1       | NM 001400.4        |
| F5       | NM 000130.4       | SELL        | NM 000655.4        |
| FAS      | NM 000043.5       | SELPLG      | NM 003006.4        |
| FASLG    | NM 000639.2       | SEMA7A      | NM 003612.4        |
| FB×022   | NM 012170.3       | SLAMF1      | ENST00000302035.10 |
| FOSB     | NM 006732.2       | SPOCK2      | NM 014767.2        |
| FOSL1    | NM 005438.4       | SPP1        | NM 000582.2        |
| FOXO1    | NM 002015.3       | STAT1       | NM 007315.3        |
| FOXO3    | NM 001455.3       | STAT3       | NM 003150.3        |
| FOXP1    | NM 032682.5       | STAT4       | NM 003151.3        |
| FOXP3    | NM 014009.3       | STAT5A      | NM 003152.3        |
| FYB      | NM 001465.4       | STAT6       | NM 003153.4        |
| FYN      | NM 002037.5       | TARP_refseq | NM 001003799.1     |
| GAPDH    | NM 002046.5       | TB×21       | NM 013351.1        |
| GATA3    | ENST00000346208.3 | TCF7        | NM 003202.3        |
| GHR      | NM 000163.4       | TGFB1       | NM 000660.5        |
| GIMAP2   | NM 015660.2       | TGFB3       | NM 003239.3        |
| GIMAP5   | NM 018384.4       | TIAFI       | NM 004740.3        |
| GIMAP7   | NM 153236.3       | TIGIT       | ENST00000481065.5  |
| GLG1     | NM 012201.5       | TK1         | NM 003258.4        |
| GNLY     | NM 006433.4       | TLR2        | NM 003264.4        |
| GZMA     | NM 006144.3       | TLR9        | NM 017442.3        |
| GZMB     | NM 004131.4       | TNF         | NM 000594.3        |
| GZMH     | NM 033423.4       | TNFRSF18    | NM 004195.2        |
| GZMK     | NM 002104.2       | TNFRSF18    | NM 001066.2        |
| GZMM     | NM 005317.3       | TNFRSF25    | NM 003790.2        |
| HAVCR2   | NM 032782.4       | TNFRSF4     | NM 003327.3        |
| HLA-A    | NM 002116.7       | TNFRSF8     | NM 001243.4        |
| HLA-C    | NM 002117.5       | TNFRSF9     | ENST00000377507.7  |
| HLA-DMA  | NM 006120.3       | TNFSF10     | NM 003810.3        |
| HLA-DMB  | NM 002118.4       | TOP2A       | NM 001067.3        |
| HLA-DPAI | NM 033554.3       | TRAC        | ENST00000611116.1  |
| HLA-DPB1 | NM 002121.5       | TRAT1       | NM 016388.3        |
| HLA-DQA1 | NM 002122.3       | TRBC2       | ENST00000466254.1  |
| HLA-DQBI | NM 002123.4       | TRDC        | ENST00000390477.2  |
| HLA-DRA  | NM 019111.4       | TRIB2       | NM 021643.3        |
| HLA-DRB3 | NM 022555.3       | TSPAN32     | NM 139022.2        |

|        |             |        |             |
|--------|-------------|--------|-------------|
| HMGB2  | NM 002129.3 | TXK    | NM 003328.2 |
| HMMR   | NM 012484.2 | TYMS   | NM 001071.2 |
| ICAMI  | NM 000201.2 | UBE2C  | NM 007019.3 |
| ICOS   | NM 012092.3 | VNN2   | NM 004665.4 |
| IER3   | NM 003897.3 | XCL1   | NM 002995.2 |
| IER5   | NM 016545.4 | ZAP70  | NM 001079.3 |
| IFNG   | NM 000619.2 | ZBED2  | NM 024508.4 |
| IFNGRI | NM 000416.2 | ZBTB16 | NM 006006.4 |
| IKZF2  | NM 016260.2 | ZNF683 | NM 173574.3 |
| IL12A  | NM 000882.3 |        |             |

---

**Table S4. List of significantly up-regulated or down-regulated genes in MAIT cells from VIR versus HC subjects.**

| Gene/protein name | Average log FC | <i>P</i> -value | Adjusted <i>P</i> -value |
|-------------------|----------------|-----------------|--------------------------|
| DUSP1             | -1.584601585   | 8.09E-123       | 2.33134E-120             |
| CD54-a            | -0.913787562   | 4.18E-90        | 1.20376E-87              |
| CD7-a             | -0.864105545   | 5.78E-62        | 1.66503E-59              |
| CD69              | -0.844541305   | 4.29E-60        | 1.23678E-57              |
| KLRB1             | -0.819549243   | 8.35E-59        | 2.40494E-56              |
| NKG7              | 0.737727716    | 6.78E-49        | 1.95337E-46              |
| GZMH              | 1.020772315    | 1.02E-46        | 2.95116E-44              |
| CD8B              | 0.861755354    | 1.26E-43        | 3.63106E-41              |
| CD8A              | 0.835503769    | 3.25E-43        | 9.36143E-41              |
| GZMB              | 1.197902553    | 1.80E-40        | 5.19507E-38              |
| CXCR4             | -0.64908587    | 4.23E-37        | 1.21702E-34              |
| CD38-a            | 1.558551901    | 2.29E-36        | 6.60254E-34              |
| IL32              | 0.470229004    | 1.35E-35        | 3.87822E-33              |
| CX3CR1            | 0.757646651    | 1.63E-34        | 4.70226E-32              |
| CD98-a            | -0.467459852   | 1.05E-33        | 3.01454E-31              |
| GIMAP5            | 0.572123556    | 1.26E-31        | 3.62880E-29              |
| TRAC              | 0.602408446    | 2.35E-31        | 6.77815E-29              |
| FOSB              | -0.58476772    | 2.82E-31        | 8.13280E-29              |
| KLRK1             | 0.584164212    | 1.40E-29        | 4.03052E-27              |
| STAT1             | 0.491179555    | 2.68E-27        | 7.72842E-25              |
| CD2               | 0.529880246    | 3.56E-26        | 1.02427E-23              |
| SELPLG            | 0.497292069    | 4.22E-26        | 1.21597E-23              |
| LGALS1            | 0.851301702    | 1.60E-22        | 4.60411E-20              |
| CD300A            | 0.426056985    | 2.53E-21        | 7.28168E-19              |
| CD5               | 0.42340284     | 1.16E-19        | 3.34022E-17              |
| CD94-a            | -0.957512967   | 2.52E-19        | 7.26533E-17              |
| CD52              | 0.428199981    | 4.53E-19        | 1.30352E-16              |
| TIGIT             | 0.202308411    | 5.86E-19        | 1.68713E-16              |
| CD3E              | 0.308269713    | 5.87E-18        | 1.69131E-15              |
| HLA-DRA           | 0.561326832    | 4.49E-17        | 1.29190E-14              |
| CCR5              | 0.401857967    | 4.02E-16        | 1.15898E-13              |
| GAPDH             | 0.349232094    | 7.28E-16        | 2.09647E-13              |
| CXCL8             | 0.139620067    | 7.71E-16        | 2.22177E-13              |
| HLA-A             | 0.273311378    | 1.87E-15        | 5.39728E-13              |
| TCF7              | 0.294796703    | 5.29E-15        | 1.52228E-12              |
| CD184-a           | 0.338988499    | 6.73E-15        | 1.93800E-12              |
| CD183-a           | 0.556605511    | 1.52E-14        | 4.37494E-12              |

---

|          |              |          |             |
|----------|--------------|----------|-------------|
| CD127-a  | -0.444429067 | 1.54E-14 | 4.44568E-12 |
| CXCR3    | 0.212493718  | 2.65E-14 | 7.61839E-12 |
| FYB      | 0.338286776  | 3.27E-14 | 9.41287E-12 |
| SELL     | 0.527898052  | 1.35E-13 | 3.89518E-11 |
| NCR3     | -0.365416292 | 1.15E-12 | 3.30223E-10 |
| CD3D     | 0.290555439  | 1.58E-12 | 4.55273E-10 |
| CD6      | 0.351351894  | 2.56E-12 | 7.38693E-10 |
| CCL5     | 0.387573042  | 3.19E-12 | 9.18402E-10 |
| CTSW     | 0.32535836   | 3.67E-12 | 1.05839E-09 |
| CD11a-a  | -0.189026704 | 4.01E-12 | 1.15414E-09 |
| CST7     | 0.317542304  | 6.09E-12 | 1.75374E-09 |
| TBX21    | 0.351706593  | 6.35E-12 | 1.82742E-09 |
| GZMK     | -0.158421803 | 7.62E-12 | 2.19562E-09 |
| LAG3     | 0.319581747  | 9.66E-12 | 2.78115E-09 |
| LCK      | 0.277566437  | 1.37E-11 | 3.95036E-09 |
| CD134-a  | 0.300989008  | 2.20E-11 | 6.34252E-09 |
| ITGB2    | 0.238001496  | 4.11E-11 | 1.18395E-08 |
| BTG1     | -0.280904068 | 4.44E-11 | 1.27805E-08 |
| CBLB     | 0.28144266   | 8.67E-11 | 2.49809E-08 |
| CHI3L2   | 0.153630112  | 2.52E-10 | 7.25192E-08 |
| GNLY     | 0.726929694  | 2.99E-10 | 8.61008E-08 |
| RUNX3    | 0.257065603  | 4.34E-10 | 1.24904E-07 |
| JUN      | -0.272077795 | 1.34E-09 | 3.85876E-07 |
| ITGA4    | 0.299016902  | 3.37E-09 | 9.69848E-07 |
| CD27-a   | -0.165722802 | 3.60E-09 | 1.03685E-06 |
| CD45RA-a | 0.754380792  | 4.32E-09 | 1.24412E-06 |
| APOBEC3G | 0.255887388  | 1.19E-08 | 3.42963E-06 |
| CD137-a  | -0.110638457 | 1.87E-08 | 5.37369E-06 |
| LEF1     | 0.201835906  | 4.30E-08 | 1.23772E-05 |
| CD44-a   | 0.229608809  | 4.47E-08 | 1.28784E-05 |
| FASLG    | 0.107516061  | 5.50E-08 | 1.58432E-05 |
| LTB      | 0.13603898   | 1.11E-07 | 3.19674E-05 |
| NAMPT    | -0.080105344 | 1.32E-07 | 3.78917E-05 |
| IL7R     | 0.257292313  | 2.21E-07 | 6.36182E-05 |
| EOMES    | 0.140109742  | 5.43E-07 | 0.000156423 |
| ZNF683   | 0.219688418  | 7.94E-07 | 0.000228684 |
| EGR1     | -0.227342295 | 8.76E-07 | 0.000252394 |
| GZMA     | 0.269230904  | 9.33E-07 | 0.000268565 |
| IL12RB1  | 0.151541363  | 1.07E-06 | 0.000308628 |
| VNN2     | 0.089362831  | 1.23E-06 | 0.000355201 |
| CD44     | 0.20460463   | 1.32E-06 | 0.000381537 |

---

---

|        |              |          |             |
|--------|--------------|----------|-------------|
| CTLA4  | 0.105072616  | 2.15E-06 | 0.000619001 |
| ITGAX  | 0.113744118  | 2.28E-06 | 0.000657235 |
| B3GAT1 | 0.094959502  | 2.41E-06 | 0.00069388  |
| TRBC2  | 0.309496005  | 2.78E-06 | 0.000801794 |
| IL18R1 | 0.149758586  | 3.06E-06 | 0.000881555 |
| CCL3   | 0.220579086  | 6.69E-06 | 0.001925826 |
| CXCR6  | 0.26399881   | 8.47E-06 | 0.002437977 |
| FAS    | 0.074408582  | 9.68E-06 | 0.002786463 |
| ANXA5  | 0.17167738   | 1.12E-05 | 0.00322552  |
| ITGAM  | 0.247194143  | 1.47E-05 | 0.004227565 |
| KLRC4  | 0.098583499  | 1.58E-05 | 0.004557289 |
| TIAF1  | 0.130571351  | 1.85E-05 | 0.005340459 |
| FOXO1  | 0.077128225  | 2.43E-05 | 0.007012294 |
| CD4-a  | -0.401719497 | 2.88E-05 | 0.008296524 |

---
